# Supplementary material
Source: PubMed Central journal article supplement (PMC11674580)
Supplement: NIHMS2043294-supplement-OSM.pdf [file NIHMS2043294-supplement-OSM.pdf]

## **Higher intraindividual variability of body mass index associated with elevated risk of COVID-19 related hospitalization and post-COVID conditions**

Elaine A. Yu, PhD;<sup>1,2\*</sup> Marjorie D. Bravo, MD, MPH;<sup>3</sup> Vivian I. Avelino-Silva, MD, PhD;<sup>1</sup> Roberta L. Bruhn, PhD;<sup>1,2</sup> Michael P. Busch, MD, PhD;<sup>1,2</sup> Brian Custer, PhD, MPH;<sup>1,2</sup>

### ***Online Supplemental Materials***

Supplemental Table 1: Comparison of cardiometabolic health variability by COVID-19 hospitalization and PCC

Supplemental Table 2: Univariable and multivariable binomial regressions between cardiometabolic health variability and COVID-19 hospitalization risk

Supplemental Table 3: Univariable and multivariable binomial regressions between cardiometabolic health variability and PCC risk

Supplemental Figure 1: Study participant flowchart

**Supplemental Table 1: Comparison of cardiometabolic health variability by COVID-19 hospitalization and PCC**

| Cardiometabolic health variability  | COVID-19 hospitalization |           |        |           | P <sup>a</sup> | PCC    |           |        |           | P <sup>a</sup> |
|-------------------------------------|--------------------------|-----------|--------|-----------|----------------|--------|-----------|--------|-----------|----------------|
|                                     | Y                        |           | N      |           |                | Y      |           | N      |           |                |
|                                     | Median                   | IQR       | Median | IQR       |                | Median | IQR       | Median | IQR       |                |
| <b>BMI (kg/m<sup>2</sup>) CV</b>    | 3.4                      | 2.4, 4.9  | 2.9    | 1.9, 4.3  | 0.06           | 3.1    | 2.1, 4.8  | 2.8    | 1.8, 4.3  | <0.01          |
| <b>SBP (mm Hg) CV</b>               | 7.1                      | 5.5, 8.7  | 6.8    | 5.4, 8.4  | 0.74           | 6.8    | 5.4, 8.5  | 6.8    | 5.4, 8.4  | 0.92           |
| <b>DBP (mm Hg) CV</b>               | 6.5                      | 5.3, 8.5  | 7.0    | 5.6, 8.4  | 0.43           | 7.1    | 5.7, 8.5  | 7.0    | 5.5, 8.4  | 0.14           |
| <b>Total cholesterol (mg/dL) CV</b> | 9.3                      | 7.3, 12.7 | 8.4    | 6.3, 10.9 | 0.04           | 8.6    | 6.5, 11.0 | 8.4    | 6.3, 10.9 | 0.32           |

<sup>a</sup> P value from Kruskal-Wallis test statistic.

Abbreviations: body mass index (BMI), coronavirus disease 2019 (COVID-19), diastolic blood pressure (DBP), post-COVID conditions (PCC), systolic blood pressure (SBP)

**Supplemental Table 2: Univariable and multivariable binomial regressions between cardiometabolic health variability and COVID-19 hospitalization risk**

| Independent variable         | Units or category | Bivariable regressions |            |             | Multivariable regression <sup>b</sup> |            |             |      |
|------------------------------|-------------------|------------------------|------------|-------------|---------------------------------------|------------|-------------|---------------------------------------|------------|-------------|---------------------------------------|------------|-------------|---------------------------------------|------------|-------------|------|
|                              |                   | RR                     | 95% CI     | p           | aRR                                   | 95% CI     | p           |      |
| BMI (kg/m <sup>2</sup> ) CV  | Quartiles         | 1 (low)                | Ref        |             |                                       |            |             |                                       |            |             |                                       |            |             |                                       |            |             |      |
|                              |                   | 2                      | 3.00       | 0.97, 9.26  | 0.01                                  | Ref        | 1.00, 9.64  | 0.05                                  |            |             |                                       |            |             |                                       |            |             |      |
|                              |                   | 3                      | 3.00       | 0.97, 9.26  | 0.01                                  | 3.41       | 1.09, 10.69 | 0.04                                  |            |             |                                       |            |             |                                       |            |             |      |
|                              |                   | 4 (high)               | 3.00       | 0.97, 9.26  | 0.01                                  | 4.15       | 1.31, 13.11 | 0.02                                  |            |             |                                       |            |             |                                       |            |             |      |
| SBP (mm Hg) CV               | Quartiles         | 1 (low)                | Ref        |             |                                       |            |             | Ref                                   |            |             |                                       |            |             |                                       |            |             |      |
|                              |                   | 2                      | 1.11       | 0.45, 2.72  | 0.82                                  |            |             |                                       | 0.94       | 0.37, 2.36  | 0.89                                  |            |             |                                       |            |             |      |
|                              |                   | 3                      | 0.78       | 0.29, 2.08  | 0.62                                  |            |             |                                       | 0.60       | 0.22, 1.67  | 0.33                                  |            |             |                                       |            |             |      |
|                              |                   | 4 (high)               | 1.56       | 0.68, 3.57  | 0.30                                  |            |             |                                       | 1.14       | 0.48, 2.71  | 0.77                                  |            |             |                                       |            |             |      |
| DBP (mm Hg) CV               | Quartiles         | 1 (low)                | Ref        |             |                                       |            |             |                                       |            |             | Ref                                   |            |             |                                       |            |             |      |
|                              |                   | 2                      | 0.77       | 0.34, 1.74  | 0.53                                  |            |             |                                       |            |             |                                       | 0.55       | 0.23, 1.31  | 0.18                                  |            |             |      |
|                              |                   | 3                      | 0.54       | 0.22, 1.34  | 0.18                                  |            |             |                                       |            |             |                                       | 0.38       | 0.15, <1.00 | 0.05                                  |            |             |      |
|                              |                   | 4 (high)               | 0.77       | 0.34, 1.74  | 0.53                                  |            |             |                                       |            |             |                                       | 0.57       | 0.24, 1.32  | 0.19                                  |            |             |      |
| Total cholesterol (mg/dL) CV | Quartiles         | 1 (low)                | Ref        |             |                                       |            |             |                                       |            |             |                                       |            |             | Ref                                   |            |             |      |
|                              |                   | 2                      | 1.00       | 0.35, 2.84  | 1.00                                  |            |             |                                       |            |             |                                       |            |             |                                       | 0.93       | 0.32, 2.66  | 0.89 |
|                              |                   | 3                      | 1.43       | 0.55, 3.74  | 0.47                                  |            |             |                                       |            |             |                                       |            |             |                                       | 1.37       | 0.51, 3.66  | 0.53 |
|                              |                   | 4 (high)               | 2.29       | 0.95, 5.53  | 0.08                                  |            |             |                                       |            |             |                                       |            |             |                                       | 2.03       | 0.83, 5.01  | 0.12 |
| Male                         |                   | 2.69                   | 1.41, 5.13 | <0.01       | 2.51                                  | 1.30, 4.85 | <0.01       | 2.29                                  | 1.19, 4.41 | 0.01        | 2.23                                  | 1.16, 4.29 | 0.02        | 2.25                                  | 1.17, 4.32 | 0.02        |      |
| Age (years)                  |                   | 1.04                   | 1.01, 1.07 | <0.01       | 1.05                                  | 1.02, 1.08 | <0.01       | 1.04                                  | 1.01, 1.07 | 0.01        | 1.04                                  | 1.01, 1.08 | <0.01       | 1.04                                  | 1.01, 1.07 | <0.01       |      |
| Geographic region            | Mountain          |                        | 3.28       | 1.05, 10.25 | 0.04                                  | 3.35       | 1.05, 10.69 | 0.04                                  | 3.76       | 1.18, 11.97 | 0.03                                  | 3.76       | 1.18, 11.97 | 0.03                                  | 3.38       | 1.05, 10.85 | 0.04 |
|                              | South             |                        | 2.19       | 0.66, 7.23  | 0.20                                  | 2.08       | 0.62, 6.96  | 0.23                                  | 2.48       | 0.74, 8.32  | 0.14                                  | 2.60       | 0.77, 8.74  | 0.12                                  | 2.12       | 0.63, 7.17  | 0.23 |
|                              | Southwest         |                        | 3.67       | 1.24, 10.87 | 0.02                                  | 3.62       | 1.21, 10.83 | 0.02                                  | 3.92       | 1.31, 11.77 | 0.01                                  | 4.32       | 1.43, 13.00 | 0.01                                  | 3.68       | 1.22, 11.05 | 0.02 |
|                              | West              |                        | Ref        |             |                                       | Ref        |             |                                       | Ref        |             |                                       | Ref        |             |                                       | Ref        |             |      |
| Number of donations          |                   | 1.02                   | 1.00, 1.05 | 0.08        | 1.00                                  | 0.98, 1.03 | 0.79        | 1.01                                  | 0.99, 1.04 | 0.34        | 1.02                                  | 0.99, 1.04 | 0.17        | 1.01                                  | 0.98, 1.03 | 0.53        |      |

<sup>a</sup> All regressions in this table were among 3,344 donors with 42,090 donations.

<sup>b</sup> Final multivariable binomial regression results shown. We selected covariates based on an *a priori* review of literature. We did not include three covariates (race-ethnicity, educational attainment, COVID-19 vaccination) due to model instability and small sample cell size.

Abbreviations: adjusted risk ratio (aRR), body mass index (BMI), coronavirus disease 2019 (COVID-19), diastolic blood pressure (DBP), post-COVID conditions (PCC), systolic blood pressure (SBP)

**Supplemental Table 3: Univariable and multivariable binomial regressions between cardiometabolic health variability and PCC risk**

| Independent variable         | Units or category                | Bivariable regressions |            |            | Multivariable regression <sup>b</sup> |            |            | Multivariable regression <sup>b</sup> |            |            | Multivariable regression <sup>b</sup> |            |       | Multivariable regression <sup>b</sup> |            |       |  |
|------------------------------|----------------------------------|------------------------|------------|------------|---------------------------------------|------------|------------|---------------------------------------|------------|------------|---------------------------------------|------------|-------|---------------------------------------|------------|-------|--|
|                              |                                  | RR                     | 95% CI     | p          | aRR                                   | 95% CI     | p          | aRR                                   | 95% CI     | p          | aRR                                   | 95% CI     | p     | aRR                                   | 95% CI     | p     |  |
| BMI (kg/m <sup>2</sup> ) CV  | Quartiles                        | 1 (low)                | Ref        |            |                                       | Ref        |            |                                       |            |            |                                       |            |       |                                       |            |       |  |
|                              |                                  | 2                      | 1.20       | 0.94, 1.54 | 0.13                                  | 1.15       | 0.90, 1.47 | 0.26                                  |            |            |                                       |            |       |                                       |            |       |  |
|                              |                                  | 3                      | 1.34       | 1.06, 1.70 | 0.02                                  | 1.23       | 0.97, 1.56 | 0.09                                  |            |            |                                       |            |       |                                       |            |       |  |
|                              |                                  | 4 (high)               | 1.50       | 1.19, 1.88 | <0.01                                 | 1.29       | 1.02, 1.64 | 0.04                                  |            |            |                                       |            |       |                                       |            |       |  |
| SBP (mm Hg) CV               | Quartiles                        | 1 (low)                | Ref        |            |                                       |            |            |                                       | Ref        |            |                                       |            |       |                                       |            |       |  |
|                              |                                  | 2                      | 0.98       | 0.79, 1.23 | 0.89                                  |            |            |                                       | 0.99       | 0.79, 1.25 | 0.95                                  |            |       |                                       |            |       |  |
|                              |                                  | 3                      | 0.95       | 0.76, 1.20 | 0.68                                  |            |            |                                       | 0.92       | 0.73, 1.16 | 0.49                                  |            |       |                                       |            |       |  |
|                              |                                  | 4 (high)               | 1.09       | 0.87, 1.35 | 0.46                                  |            |            |                                       | 1.04       | 0.83, 1.30 | 0.74                                  |            |       |                                       |            |       |  |
| DBP (mm Hg) CV               | Quartiles                        | 1 (low)                | Ref        |            |                                       |            |            |                                       |            |            | Ref                                   |            |       |                                       |            |       |  |
|                              |                                  | 2                      | 0.98       | 0.77, 1.23 | 0.84                                  |            |            |                                       |            |            | 0.98                                  | 0.77, 1.23 | 0.84  |                                       |            |       |  |
|                              |                                  | 3                      | 1.10       | 0.88, 1.38 | 0.38                                  |            |            |                                       |            |            | 1.08                                  | 0.86, 1.36 | 0.50  |                                       |            |       |  |
|                              |                                  | 4 (high)               | 1.10       | 0.88, 1.38 | 0.38                                  |            |            |                                       |            |            | 1.05                                  | 0.83, 1.31 | 0.69  |                                       |            |       |  |
| Total cholesterol (mg/dL) CV | Quartiles                        | 1 (low)                | Ref        |            |                                       |            |            |                                       |            |            |                                       |            |       | Ref                                   |            |       |  |
|                              |                                  | 2                      | 1.08       | 0.85, 1.35 | 0.54                                  |            |            |                                       |            |            |                                       |            |       | 1.05                                  | 0.83, 1.32 | 0.68  |  |
|                              |                                  | 3                      | 1.15       | 0.92, 1.44 | 0.22                                  |            |            |                                       |            |            |                                       |            |       | 1.06                                  | 0.84, 1.34 | 0.61  |  |
|                              |                                  | 4 (high)               | 1.10       | 0.88, 1.38 | 0.41                                  |            |            |                                       |            |            |                                       |            |       | 1.01                                  | 0.80, 1.27 | 0.94  |  |
| Male                         |                                  | 0.74                   | 0.63, 0.88 | <0.01      | 0.76                                  | 0.64, 0.91 | <0.01      | 0.75                                  | 0.63, 0.89 | <0.01      | 0.75                                  | 0.63, 0.89 | <0.01 | 0.75                                  | 0.63, 0.89 | <0.01 |  |
| Age (years)                  |                                  | 1.00                   | 0.99, 1.00 | 0.17       | 1.00                                  | 1.00, 1.01 | 0.23       | 1.00                                  | 1.00, 1.01 | 0.43       | 1.00                                  | 1.00, 1.01 | 0.38  | 1.00                                  | 1.00, 1.01 | 0.36  |  |
| Race-ethnicity               | White (non-Hispanic)             | Ref                    |            |            | Ref                                   |            |            | Ref                                   |            |            | Ref                                   |            |       | Ref                                   |            |       |  |
|                              | Black (non-Hispanic)             | 1.67                   | 0.87, 3.19 | 0.12       | 1.79                                  | 0.94, 3.41 | 0.08       | 1.75                                  | 0.91, 3.35 | 0.09       | 1.77                                  | 0.92, 3.38 | 0.09  | 1.75                                  | 0.92, 3.35 | 0.09  |  |
|                              | Other                            | 1.25                   | 1.00, 1.57 | <0.05      | 1.20                                  | 0.95, 1.52 | 0.13       | 1.20                                  | 0.95, 1.52 | 0.13       | 1.20                                  | 0.95, 1.53 | 0.13  | 1.20                                  | 0.94, 1.52 | 0.14  |  |
| Educational attainment       | < High school                    | 1.61                   | 0.72, 3.61 | 0.24       | 1.39                                  | 0.62, 3.10 | 0.42       | 1.41                                  | 0.63, 3.14 | 0.41       | 1.43                                  | 0.64, 3.19 | 0.38  | 1.42                                  | 0.64, 3.17 | 0.39  |  |
|                              | High school diploma <sup>c</sup> | 1.49                   | 1.20, 1.84 | <0.01      | 1.34                                  | 1.07, 1.67 | 0.01       | 1.35                                  | 1.08, 1.69 | <0.01      | 1.36                                  | 1.09, 1.69 | 0.01  | 1.36                                  | 1.09, 1.70 | 0.01  |  |
|                              | Bachelor's degree                | 1.18                   | 0.94, 1.47 | 0.16       | 1.15                                  | 0.91, 1.44 | 0.24       | 1.14                                  | 0.91, 1.43 | 0.27       | 1.14                                  | 0.91, 1.43 | 0.26  | 1.14                                  | 0.91, 1.43 | 0.26  |  |
|                              | Graduate degree                  | Ref                    |            |            | Ref                                   |            |            | Ref                                   |            |            | Ref                                   |            |       | Ref                                   |            |       |  |
| Geographic region            | Mountain                         | 1.77                   | 1.37, 2.28 | <0.01      | 1.74                                  | 1.34, 2.26 | <0.01      | 1.79                                  | 1.38, 2.32 | <0.01      | 1.78                                  | 1.37, 2.31 | <0.01 | 1.78                                  | 1.37, 2.31 | <0.01 |  |
|                              | South                            | 1.70                   | 1.32, 2.18 | <0.01      | 1.60                                  | 1.23, 2.08 | <0.01      | 1.66                                  | 1.28, 2.15 | <0.01      | 1.64                                  | 1.26, 2.12 | <0.01 | 1.65                                  | 1.27, 2.15 | <0.01 |  |
|                              | Southwest                        | 1.67                   | 1.31, 2.12 | <0.01      | 1.64                                  | 1.28, 2.09 | <0.01      | 1.67                                  | 1.31, 2.14 | <0.01      | 1.66                                  | 1.30, 2.12 | <0.01 | 1.67                                  | 1.31, 2.13 | <0.01 |  |
|                              | West                             | Ref                    |            |            | Ref                                   |            |            | Ref                                   |            |            | Ref                                   |            |       | Ref                                   |            |       |  |
| COVID-19 vaccination         |                                  | 0.81                   | 0.67, 0.99 | 0.04       | 0.88                                  | 0.72, 1.08 | 0.22       | 0.88                                  | 0.72, 1.08 | 0.22       | 0.88                                  | 0.72, 1.07 | 0.20  | 0.88                                  | 0.72, 1.08 | 0.23  |  |
| Number of donations          |                                  | 1.00                   | 0.99, 1.01 | 0.91       | 1.00                                  | 0.99, 1.00 | 0.36       | 1.00                                  | 0.99, 1.01 | 0.66       | 1.00                                  | 0.99, 1.01 | 0.53  | 1.00                                  | 0.99, 1.01 | 0.53  |  |

<sup>a</sup> All regressions in this table were among 3,344 donors with 42,090 donations.

<sup>b</sup> Final multivariable binomial regression results shown. We selected covariates based on an *a priori* review of literature.

<sup>c</sup> Includes participants with an associate's degree or some college coursework without completion of a degree

Abbreviations: adjusted risk ratio (aRR), body mass index (BMI), coronavirus disease 2019 (COVID-19), diastolic blood pressure (DBP), post-COVID conditions (PCC), systolic blood pressure (SBP), reference group (Ref), risk ratio (RR)

**Supplemental Figure 1: Study participant flowchart<sup>a</sup>**

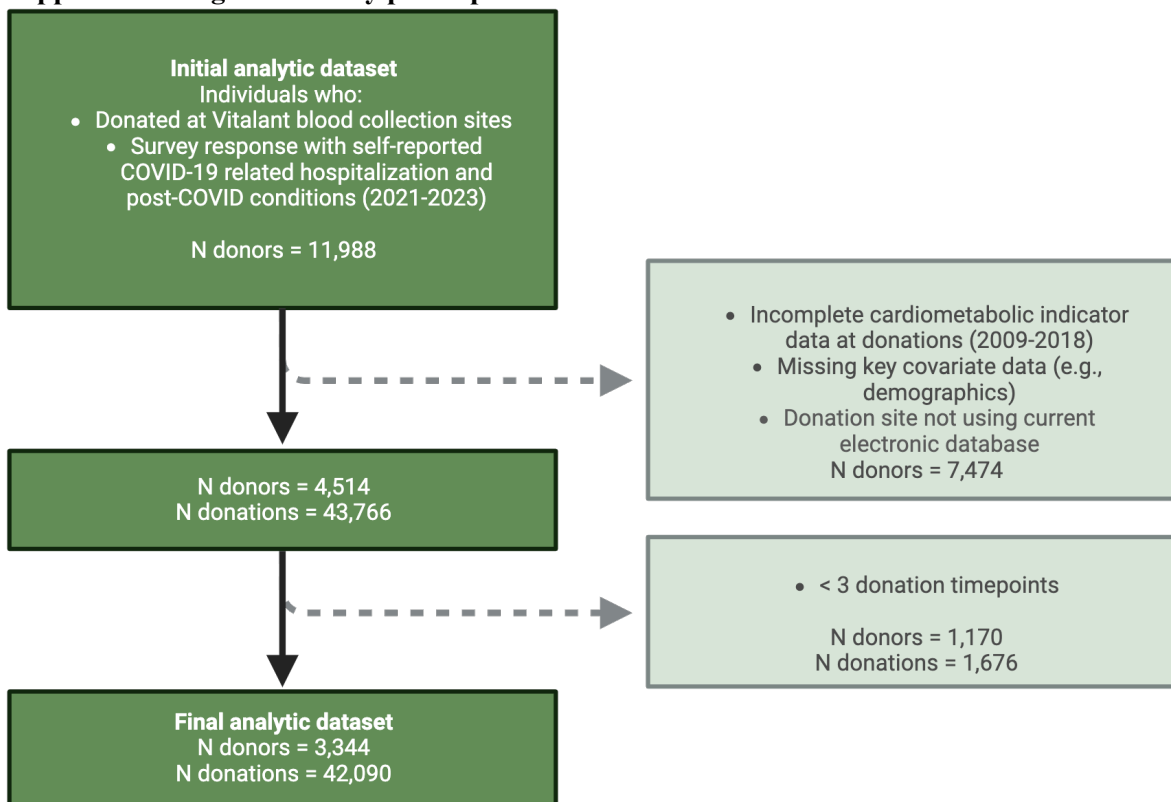

<sup>a</sup>This study included a subset of the donors from a larger COVID-19 research program. A total of 294,408 donors were sent as invitations for survey participation between December 2021 and February 2023. Among these donors, 33,610 (11.4%) voluntarily provided consent to participate and responses to the survey.
